# Supplementary material
Source: HighWire-hosted journal article supplement (http://cmajopen.ca/highwire/filestream/80744/field_highwire_adjunct_files/3/open-2013-0040-original-submission.pdf)
Supplement: open-2013-0040-original-submission.pdf [file open-2013-0040-original-submission.pdf]

1  
2  
3 CPAC – Canadian Partnership Against Cancer  
4 CPG - Clinical practice guideline  
5 CWG - Clinical Working Group  
6 KTA – Knowledge to action  
7 SOR – Strength of recommendation  
8 SQUID - Summary Quality InDex  
9  
10  
11  
12  
13

## 14 **Abstract**

15  
16  
17 **Background:** The Building on Existing Tools to Improve Chronic Disease

18 Prevention and Screening (CDPS) in Primary Care Practice (BETTER) trial is a  
19 pragmatic randomized controlled trial that translates evidence to practice across  
20 multiple diseases: diabetes; cardiovascular disease; cancer (cervical, breast,  
21 colorectal); and associated lifestyle factors (nutrition, exercise, smoking, alcohol).  
22  
23

24 We describe a new systematic process for establishing an integrated evidence  
25 platform, and new clinical tools to summarize Clinical Practice Guidelines (CPGs).  
26  
27

28  
29 **Methods:** Using the AGREE methodology, three to five high quality CPGs were  
30 identified for each disease. Recommendations for CDPS were extracted. A literature  
31 review was done for CDPS in patients with depression. A structured search of the  
32 grey literature was done for CDPS tools. **Results:** High-grade recommendations for  
33  
34

35 CDPS were identified for the target diseases. Limitations included: conflicting  
36 recommendations, vague wording, and different taxonomies for strength of  
37 recommendation (SOR). No high quality evidence was found for maneuvers to  
38 improve CDPS in patients with depression. The tool search yielded 180 CDPS tools  
39 of interest. The BETTER Guideline Synthesis Framework and integrated clinical  
40 algorithms were developed. **Conclusion:** The BETTER intervention was built upon  
41 existing CPGs and tools, with the novel approach of engaging end-users in tailoring  
42  
43  
44  
45  
46  
47  
48  
49  
50  
51  
52  
53  
54  
55  
56  
57  
58  
59  
60

1  
2  
3 the content and design of the implementation. To promote clinical utility, CPGs  
4  
5 should be harmonized to deliver consistent clinical messages, and to use a single  
6  
7 taxonomy for SOR. The clinical impact of shared decision making tools would be  
8  
9 increased if they were indexed and validated for utility.  
10  
11

### 12 **Key Words**

13  
14 Primary Care, Primary Prevention, Screening, Diabetes, Cardiovascular Disease,  
15  
16 Breast Cancer, Cervical Cancer, Lung Cancer, Colon Cancer, Clinical Practice  
17  
18  
19 Guidelines  
20  
21

22  
23  
24  
25 Word Count: 2354  
26  
27

### 28 **Introduction**

29  
30  
31  
32  
33  
34 Family practice is the setting where most healthcare activities for improving chronic  
35  
36 disease prevention and screening (CDPS) are applied.[1-6] There are a number of  
37  
38 effective, evidence-based, maneuvers for CDPS which remain underutilized. This is  
39  
40 particularly true for patients with mental illness. [7-9] There is a need for a CDPS  
41  
42 strategy that concurrently addresses multiple conditions. Promoting practice  
43  
44 organization that delivers integrated CDPS in a time-efficient manner is a priority.  
45  
46  
47 Provider time required to deliver all recommended CDPS maneuvers is estimated to  
48  
49 be 7.4 hours daily with current practice structures.[10-17]  
50  
51  
52

53  
54  
55  
56 The Building on Existing Tools to Improve Chronic Disease Prevention and  
57  
58  
59  
60

1  
2  
3 Screening in Primary Care Practice (BETTER) trial is a clustered randomized  
4  
5 controlled trial involving eight Primary Care Team practices across two Canadian  
6  
7 Provinces. The objective is improving CDPS through practice and patient-level  
8  
9 interventions while concurrently implementing evidence for multiple conditions  
10  
11 into practice.  
12  
13  
14  
15

16  
17  
18 CDPS maneuvers are summarized in clinical practice guidelines (CPGs). In theory,  
19  
20 CPGs are systematically developed summaries of the best evidence available on a  
21  
22 single topic, but their effectiveness as tools to facilitate translation of evidence into  
23  
24 practice has been inconsistent.[18,19] Multiple CPGs on the same topic cause  
25  
26 confusion with conflicting recommendations. Han and colleagues have highlighted  
27  
28 this multiplicity as being a significant problem in clinical decision making,  
29  
30 particularly with breast and cervical cancer screening guidelines.[20]  
31  
32  
33  
34  
35  
36

37 This paper describes the process used to determine the evidence-base for the  
38  
39 BETTER trial interventions for CDPS across multiple target conditions. In addition,  
40  
41 we assessed the evidence for CDPS interventions in patients with depression, as in  
42  
43 the study design moderate mental illness was our pre-specified subgroup. An  
44  
45 adaption of the Knowledge to Action (KTA) Framework extended this model to  
46  
47 situations requiring the integration of clinical practice guidelines across multiple  
48  
49 medical conditions.[21] We present the findings of our tool search and suggestions  
50  
51 for future work in the area of organization and validation of clinical tools.  
52  
53  
54  
55  
56  
57  
58  
59  
60

## Methods

The Knowledge to Action Cycle was the starting framework for the derivation of the evidence-base to inform the BETTER trial. The framework evolved to accommodate the inclusion of concurrent interventions for primary prevention and screening across diabetes, cardiovascular disease, and cancer (cervical, breast and colorectal), and associated lifestyle risk factors. (Figure 1) Rather than “knowledge creation” as the core of the KTA cycle, BETTER is based on using existing tools, in this case CPGs. It was important that we had a clear process with iterative stakeholder engagement to select high quality CPGs and then decide which recommendations to implement. To this end, we assembled a Clinical Working Group (CWG) composed of clinicians (Primary Care Physicians, a nurse practitioner, registered nurses, a licensed practical nurse and a dietician), a health services librarian, and members of the Centre for Effective Practice who are experts in guideline implementation and represent non-clinical participants.

High-quality CPGs were identified through a focused four-step process (Table 1). This was based on the search strategy for CPGs developed by the Guidelines Advisory Committee at the Centre for Effective Practice, published in the Canadian Medical Association Handbook on Clinical Practice Guidelines. [22] The inclusion criteria were: diabetes, cardiovascular disease, breast cancer, colorectal cancer, cervical cancer, skin cancer, and lung cancer. The search was limited to guidelines published in English between 2004 and 2009. Guidelines were excluded if they did

1  
2  
3 not include any recommendations related to screening or primary prevention of the  
4 areas of interest, or were not applicable to primary care. A search for effective CDPS  
5  
6 in patients with depression was conducted (Table 1). The BETTER search and  
7  
8 appraisal strategy for existing tools to promote CDPS is included in Tables 2 and 3.  
9  
10

11  
12  
13 Guidelines found for each clinical topic were retrieved in full text and were  
14  
15 evaluated using the domains from the AGREE instrument (23) with particular focus  
16  
17 on the domains of Rigour of Development and Editorial Independence. This ensured  
18  
19 that a systematic search was conducted, all evidence was considered,  
20  
21 recommendations in the guidelines were linked directly to the levels of evidence,  
22  
23 and that the guideline was developed with minimal bias. In an effort to build on  
24  
25 existing work in CPG evaluation, the Canadian Partnership Against Cancer (CPAC)  
26  
27 was asked to provide the full AGREE scores for all breast, cervical, colorectal, lung  
28  
29 and skin cancer guidelines published between 2005 and 2008. Additional  
30  
31 guidelines in these areas published between 2008 and 2009 were identified and  
32  
33 evaluated. Both sets of guidelines were then compared to determine the highest  
34  
35 quality CPGs. By applying these criteria, the top three to five CPGs in each clinical  
36  
37 area were identified. Where available, Canadian CPGs, and CPGs published most  
38  
39 recently were used if they satisfied the quality criteria.  
40  
41  
42  
43  
44  
45  
46  
47  
48  
49

50  
51 In the initial evidence review phase, smaller disease theme groups were developed  
52  
53 from the members of the CWG for diabetes, cardiovascular disease, and cancer.  
54  
55

56 Horizontal theme groups were established for lifestyle modification (smoking,  
57  
58  
59  
60

1  
2  
3 alcohol, exercise, nutrition), family history, and mental health. Each of the disease  
4  
5 theme groups reviewed the recommendations specific to their clinical area, while  
6  
7 the horizontal groups considered all of the guideline recommendations as they  
8  
9 related to their topic. At least two members of each group independently reviewed  
10  
11 each recommendation and clinical tool, and where disagreement existed between  
12  
13 the guidelines or reviewers, decisions were reached through discussion with the  
14  
15 group. All recommendations were presented to the entire CWG for final review. A  
16  
17 literature review was done by the mental health subgroup to find strategies to  
18  
19 increase uptake of CDPS maneuvers in patients with depression.  
20  
21  
22  
23  
24  
25  
26  
27  
28  
29  
30  
31  
32  
33  
34  
35  
36  
37  
38  
39  
40  
41  
42  
43  
44  
45  
46  
47  
48  
49  
50

51  
52 It was the responsibility of the CWG to identify guidelines or recommendations  
53  
54 considered clinically controversial, or additional relevant literature that may have  
55  
56 postdated the publication of the guidelines. In these situations, primary literature  
57  
58 was searched and/or updated guidelines were retrieved and included in the CWG  
59  
60 review. To ensure that recommendations were appropriate within the specific  
provincial contexts, local guidelines and policies from provincial bodies were  
identified. These were compared to the selected recommendations to ensure  
consistency and applicability. These recommendations were tailored to patients'  
personal risk factors and family history.

## Results

1  
2  
3 The selected guidelines can be found in Appendix A. Strong evidence was identified  
4 for maneuvers for CDPS for breast, colorectal and cervical cancer, diabetes,  
5  
6 cardiovascular disease, and for the prevention of lung cancer. Given the absence of  
7  
8 evidence for the general population screening in skin, lung, and colorectal and  
9  
10 breast cancer ages 40-49, the CWG recommended these not be included in the  
11  
12 project scope. Breast cancer screening and colorectal cancer screening were  
13  
14 recommended in the 40-49 year range for those patients with family history  
15  
16 indicating higher risk. The CWG requested additional searching for prostate cancer,  
17  
18 and following the review concluded insufficient evidence to recommend population  
19  
20 screening. The literature review for effective strategies to increase CDPS in patients  
21  
22 with depression was done. The CWG concluded that there were no high quality  
23  
24 studies demonstrating specific interventions for this patient population.  
25  
26  
27  
28  
29  
30  
31  
32  
33  
34

35 The harmonization of the guideline recommendations was critical to their effective  
36  
37 implementation. For a recommendation to be clinically useful it not only had to have  
38  
39 a high-grade level of evidence, it had to be formulated in a way that was actionable.  
40  
41 Table 4 summarizes one example of this, showing the recommendations from four  
42  
43 different guidelines about the timing of screening patients for diabetes. Each of the  
44  
45 guidelines had a different taxonomy for indicating strength of recommendation and  
46  
47 SOR. Recommendation number II is the only one that is specific, comprehensive and  
48  
49 actionable.  
50  
51  
52  
53  
54  
55  
56  
57  
58  
59  
60

1  
2  
3 Clinical algorithms simultaneously relay the principal results of the guideline review  
4  
5 of the strongest available recommendations for CDPS across all of the maneuvers.  
6  
7

8 They provided a clear and consistent approach specifically tailored to the  
9  
10 intervention. Figure 2 is the algorithm for primary prevention and screening for  
11  
12 cardiovascular disease and diabetes, Figure 3 depicts primary prevention and  
13  
14 screening for cardiovascular disease in patients with existing type 2 diabetes, and  
15  
16 Figure 4 depicts primary prevention and screening for breast, cervical, and  
17  
18 colorectal cancer, and for the primary prevention of lung cancer.  
19  
20  
21

22  
23  
24 Using a structured search of the grey literature (Table 2), 180 CDPS clinical tools,  
25  
26 from over 1000 considered, were identified for review for inclusion in the BETTER  
27  
28 tool kit. A selection of tools was chosen for the assessment of alcohol, depression,  
29  
30 smoking, diet, exercise, and family history. A key finding of the study was the lack of  
31  
32 a systematic organization of tools for implementing recommendations. These  
33  
34 recommendations are not frequently published or indexed, nor was there a reliable  
35  
36 filter for the quality and clinical utility in the repositories. To avoid redundancy, we  
37  
38 proposed a ranking and indexing scheme to help facilitate the cataloguing and  
39  
40 retrieving of high quality tools (Table 3).  
41  
42  
43  
44  
45  
46  
47

## 48 **Interpretation**

49  
50  
51  
52  
53 The determination of the evidence base for the BETTER trial was an exercise in  
54  
55 disassembling high quality clinical practice guideline recommendations into core  
56  
57  
58  
59  
60



1  
2  
3 components, and re-assembling them to result in integrated, implementable, and  
4  
5 measurable recommendations. The recommendations for CDPS maneuvers across  
6  
7 multiple diseases then went into an algorithm to facilitate clinical decision-making.  
8  
9 This evidence framework was combined with elements of shared-decision making,  
10  
11 and the principles of motivational interviewing to form the basis for the BETTER  
12  
13 interventions. Explicit in this framework are opportunities for patients to opt out of  
14  
15 discussing any area they wish. This approach facilitates the patient-provider  
16  
17 partnership in primary care, by supporting patients' autonomy, and recognizes the  
18  
19 importance of patient's values, preferences, and readiness for change to the care  
20  
21 relationships in primary care/ family practice.  
22  
23  
24  
25  
26  
27  
28  
29

30 No robust primary studies demonstrating solid outcomes for CDPS uptake  
31  
32 interventions were identified for primary care patients suffering from depression.  
33  
34 The lack of high-level evidence for such interventions suggests that further research  
35  
36 into this area is needed.  
37  
38  
39  
40  
41

42 The BETTER evidence review shed some light on why guidelines have been poorly  
43  
44 implemented. Our iterative review of guideline recommendations, with an eye to  
45  
46 clinical applicability, showed that the imprecise language of recommendations  
47  
48 resulted in a discussion about what we should actually "do" – what was the spirit of  
49  
50 the recommendation? We realized that for use across multiple diseases we needed  
51  
52 to focus on the recommendations that have the greatest effect and best evidence.  
53  
54  
55

56 The variation in taxonomy regarding the strength of recommendations challenged  
57  
58  
59  
60

1  
2  
3 the proper interpretation of the strength of evidence for each guideline. We believe  
4 this is a major limitation to the applicability of guidelines. We propose that all  
5 guideline developers settle on the use a single taxonomy for strength of evidence,  
6 which is clear and easy for clinicians to understand.  
7  
8  
9  
10  
11

12  
13  
14  
15 We developed an algorithm format for displaying the clinical recommendations.  
16

17  
18 This also provided a structure for adding “goal sets” to the electronic medical  
19 records that can be created for individual patients. We developed an iterative  
20 consensus among providers which responded to local practice patterns, and  
21 accepted variations in places where there was insufficient evidence to recommend a  
22 different approach. For example, there are different cervical cancer and colorectal  
23 cancer screening protocols in Ontario and Alberta, with insufficient evidence to  
24 support one over the other. Without the clear engagement of clinicians during the  
25 design of the intervention we believe that there is a risk of reduced uptake due to  
26 clinicians not being in agreement with all of the recommendations, or omitting  
27 recommendations due to error. For example, the American Diabetes Guidelines  
28 recommending the possible use of pioglitazone in the prevention of progression  
29 from pre-diabetes to diabetes was considered out of scope of this project by the  
30 CWG. The CWG’s reasons included safety concerns, and a lack of evidence that it is  
31 superior to physical exercise in the prevention of diabetes. Given the superiority of  
32 exercise over metformin in this instance, exercise was recommended as the primary  
33 method for preventing the progression of impaired fasting glucose to diabetes, with  
34  
35  
36  
37  
38  
39  
40  
41  
42  
43  
44  
45  
46  
47  
48  
49  
50  
51  
52  
53  
54  
55  
56  
57  
58  
59  
60

1  
2  
3 referral to the physician to discuss metformin as a secondary method for this  
4  
5 study.[26]  
6  
7  
8  
9

10 Implementing CPGs in clinical care needs both high-grade recommendations and  
11  
12 clear statements about clinically meaningful targets. However, measuring primary  
13  
14 care by adherence to a rationalist view of attainment of clinical metrics has the risk  
15  
16 of not focusing on the processes of care with strong evidence to support quality.  
17  
18  
19 [27]  
20  
21  
22  
23  
24

25 The BETTER trial was conceived to build upon existing tools. We tried to identify  
26  
27 and review a large number of tools. This process was impeded by most of the tools  
28  
29 in the grey literature having weak indexing or classification. The lack of structure in  
30  
31 terms of clinical utility and robustness of the tools made the process difficult. We  
32  
33 endeavored to index and classify the relevant tools we identified. Given the  
34  
35 importance of effective patient communication in facilitating true evidence-based  
36  
37 shared decision making, we recommend that future effort be directed towards  
38  
39 categorizing and validating tools, making the investment of time and effort in their  
40  
41 creation more profitable.  
42  
43  
44  
45  
46  
47  
48

## 49 **Conclusion**

50  
51  
52  
53

54 Both a solid evidence-base and including target end users in the identification and  
55  
56 development of the knowledge products are required for initiatives to improve  
57  
58  
59  
60

1  
2  
3 clinical care processes for CDPS. It is impractical for individual projects to reproduce  
4  
5 systematic reviews of the primary literature to establish the base. The use of high  
6  
7 quality clinical practice guidelines is a more practical approach to handling this  
8  
9 problem. A novel aspect of this work was the iterative approach employed to  
10  
11 ensure that the evidence and knowledge products were reflective of the needs of the  
12  
13 users. We found the conceptual framework of the modified BETTER- guideline  
14  
15 synthesis cycle worked well. This produced a common frame of reference for  
16  
17 inclusion and exclusion in the study scope helped to standardize the intervention,  
18  
19 and helped in developing integrated recommendations and tools for CDPS. It also  
20  
21 promoted a deliberative, iterative process to yield clinical recommendations that  
22  
23 were explicit and measurable.  
24  
25  
26  
27  
28  
29  
30  
31

32 The emphasis in the BETTER intervention development was to build on what exists  
33  
34 to develop effective tool kits and strategies for implementation. In order to make  
35  
36 CPGs useful, focus on the implementation strategy of suites of recommendations is  
37  
38 more congruent with practice. To promote clinical utility, CPGs should be  
39  
40 harmonized to deliver consistent clinical messages, and use a single taxonomy for  
41  
42 strength of recommendations. The BETTER care algorithms were an effective way to  
43  
44 summarize the integrated recommendations. Clinical practice guidelines are useful  
45  
46 syntheses of information regarding single diseases. Improved uptake in practice  
47  
48 may be achieved by re-formatting them for multiple diseases as we have illustrated  
49  
50 with these algorithms.  
51  
52  
53  
54  
55  
56  
57  
58  
59  
60

## References

1. Clinical Prevention Policy Review Committee BcMoH. Establishing Clinical Prevention Policy in British Columbia: Part I What is worth Doing? . British Columbia: Center for Health Services and Policy Research; 2007:i- 46.
2. McIsaac W, Fuller-Thomson E, Talbot Y. Does having regular care by a family physician improve preventive care? *Can Fam Physician*. 2001;47:70-76. PMID: PMC2014713
3. Upshur R, Leong A, Maaten S, Wang L. Patterns of Primary and Secondary Prevention in: Jaakkimainen L, Upshur R, Klein-Geltink JE, et al., (eds). *Primary Care in Ontario: ICES Atlas*. Toronto: Institute for Clinical and Evaluative Sciences; 2006 78-89.
4. Starfield B, Shi L, Macinko J. Contribution of Primary Care to Health Systems and Health. *Milbank Q*. 2005;83:457-502. DOI: 10.1111/j.1468-0009.2005.00409.x
5. Nicholson E. Verbal Communication: Results from a national survey for the Colorectal Cancer Screening Network.
6. Stead L, Bergson G, Lancaster T. Physician advice for smoking cessation. *Cochrane Database Syst Rev*. 2008:CD000165.
7. Druss BG, Rosenheck RA, Desai MM, Perlin JB. Quality of Preventive Medical Care for Patients With Mental Disorders. *Medical Care*. 2002;40(2):129-36. PMID: 11802085.
8. Carney CP, Jones LE. The Influence of Type and Severity of Mental Illness on Receipt of Screening Mammography. *J Gen Intern Med*. 2006;21:1097-1104. PMID:16970559.
9. Pirraglia P, Sanyal P, Daniels D, Ferris T. Depressive Symptom Burden as a Barrier to

- 1  
2  
3 Screening for Breast and Cervical Cancers. *Journal of Women's Health*. 2004;13:731-  
4 738. PMID: 15333288.  
5  
6  
7  
8 10. Yarnall KSH, Pollak KI, Ostbye T, Krause KM, Michener JL. Primary Care: Is There  
9 Enough Time for Prevention? *Am J Public Health*. 2003;93:635-641. PMID:  
10 12660210  
11  
12  
13 11. Feifer C, Ornstein Steven M. Strategies for Increasing Adherence to Clinical  
14 Guidelines and Improving Patient Outcomes in Small Primary Care Practices. *Jt*  
15 *Comm J Qual Saf*. 2004;30:432-441. PMID: 15357133  
16  
17  
18  
19  
20 12. Lemelin J, Hogg W, Baskerville N. Evidence to action: a tailored multifaceted  
21 approach to changing family physician practice patterns and improving preventive  
22 care. *CMAJ*. 2001;164:757-763. PMID:11276541  
23  
24  
25  
26  
27 13. Feifer C, Ornstein SM, Jenkins RG, et al. The Logic Behind a Multimethod  
28 Intervention to Improve Adherence to Clinical Practice Guidelines in a Nationwide  
29 Network of Primary Care Practices. *Eval Health Prof*. 2006;29:65-88. PMID:16510880  
30  
31  
32  
33 14. Davis D, Goldman J, Palda V. *Canadian Medical Association Handbook on Clinical*  
34 *Practice Guidelines*. Ottawa: Canadian Medical Association; 2007.  
35  
36  
37  
38 15. Grimshaw JM, Thomas RE, MacLennan G, et al. Effectiveness and efficiency of  
39 guideline dissemination and implementation strategies. *Health Technol Assess*.  
40 2004;8(6):iii-iv, 1-72. PMID:14960256  
41  
42  
43  
44 16. Grol R. Successes and Failures in the implementation of evidence-based guidelines  
45 for clinical practice. *Med Care*. 2001; 39(8 Suppl 2):II46-54. PMID:11583121  
46  
47  
48  
49 17. Grol R, Grimshaw J. From best evidence to best practice: effective implementation of  
50 change in patients' care. *Lancet*. 2003; 362(9391):1225-30. PMID: 14568747.  
51  
52  
53  
54 18. Grimshaw J, Eccles M, Thomas R, MacLennan G., et al. Toward evidence-based  
55 quality improvement: evidence (and its limitations) of the effectiveness of guideline  
56  
57  
58  
59  
60

- 1  
2  
3 dissemination and implementation strategies 1966-1998. J Gen Intern Med.  
4  
5 2006;21(Suppl 2):S14-S20. doi: 10.1111/j.1525-1497.2006.00357.x. PMID:  
6  
7 16637955  
8  
9  
10 19. Institute of Medicine. Knowing what works in health care: A roadmap for the Nation.  
11  
12 Washington, DC: National Academy Press; 2008., Chapter 5, 133-134.  
13  
14 20. Han PKH, Klabunde CN, Breen N, Yuan G. et al. Multiple clinical practice guidelines  
15  
16 for breast and cervical cancer screening. Perceptions of US primary care physicians.  
17  
18 Med Care. 2011;49(2):139-48. PMID: 21206294  
19  
20  
21 21. Graham ID, Logan J, Harrison MB, Straus SE, Tetroe J, Caswel W, Robinson N, Lost in  
22  
23 knowledge translation: time for a map? J Cont Educ Health Prof, 2006; 26(1):13-24.  
24  
25 PMID: 16557505.  
26  
27  
28 22. Davis D, Goldman J, Palda VA. Canadian Medical Association handbook on clinical  
29  
30 practice guidelines. Ottawa: Canadian Medical Association; 2007. Available from  
31  
32 [http://www.cma.ca//multimedia/CMA/Content/Images/ClinicalResources/PDF/E](http://www.cma.ca//multimedia/CMA/Content/Images/ClinicalResources/PDF/English/CPGHandbook.pdf)  
33  
34 [nglish/CPGHandbook.pdf](http://www.cma.ca//multimedia/CMA/Content/Images/ClinicalResources/PDF/English/CPGHandbook.pdf)  
35  
36  
37 23. The AGREE Collaboration. Development and validation of an international appraisal  
38  
39 instrument for assessing the quality of clinical practice guidelines: the AGREE  
40  
41 project. Quality and Safety in Health Care, 2003;12: 18–23. Available from:  
42  
43 <http://www.agreetrust.org/index.aspx?o=1086>  
44  
45  
46 24. Canadian Diabetes Association Clinical Practice Guidelines Expert Committee.  
47  
48 (2008, September). Canadian Diabetes Association 2008 clinical practice guidelines  
49  
50 for the prevention and management of diabetes in Canada. Canadian Journal of  
51  
52 Diabetes, 32(Suppl1), S1-S201. Available from: [www.diabetes.ca/for-](http://www.diabetes.ca/for-professionals/resources/2008-cpg/)  
53  
54 [professionals/resources/2008-cpg/](http://www.diabetes.ca/for-professionals/resources/2008-cpg/)  
55  
56  
57  
58  
59  
60

- 1  
2  
3  
4  
5  
6  
7  
8  
9  
10  
11  
12  
13  
14  
15  
16  
17  
18  
19  
20  
21  
22  
23  
24  
25  
26  
27  
28  
29  
30  
31  
32  
33  
34  
35  
36  
37  
38  
39  
40  
41  
42  
43  
44  
45  
46  
47  
48  
49  
50  
51  
52  
53  
54  
55  
56  
57  
58  
59  
60
25. American Diabetes Association. (2010). American Diabetes Association clinical practice recommendations 2009. *Diabetes Care* 32(Supp 1), S1-S96. Available from: [http://care.diabetesjournals.org/content/33/Supplement\\_1](http://care.diabetesjournals.org/content/33/Supplement_1)
26. U.S. Preventive Services Task Force. (2008, June). Screening for type 2 diabetes mellitus in adults. Agency for Healthcare Research and Quality. Available from: <http://www.ahrq.gov/Clinic/uspstf08/type2/type2rs.htm>
27. Diabetes Prevention Program Research Group, Knowler WC, Fowler SE, Hamman RF, et al. 10-year follow-up of diabetes incidence and weight loss in the Diabetes Prevention Program Outcomes Study. *Lancet*. 2009; 374(9702):1677-86. PMID: 19878986



**Figure 1: The BETTER – Guideline Synthesis framework for the derivation of the evidence platform and interventions for the BETTER Trial. The triangle in the centre of the diagram is an extension of the “knowledge creation funnel” in the knowledge to action (KTA) cycle. [21] In our model there is knowledge synthesis with each funnel representing existing literature captured in high quality clinical practice guidelines. This is then contextually integrated for each patient’s family history and modifiable risk factors. The side bar shows the structured evidence review process of the clinical working group (CWG). The boxes around the circumference of the cycle refer to the steps for implementing the recommendations and tools in both the practice and patient level interventions of the BETTER trial.**

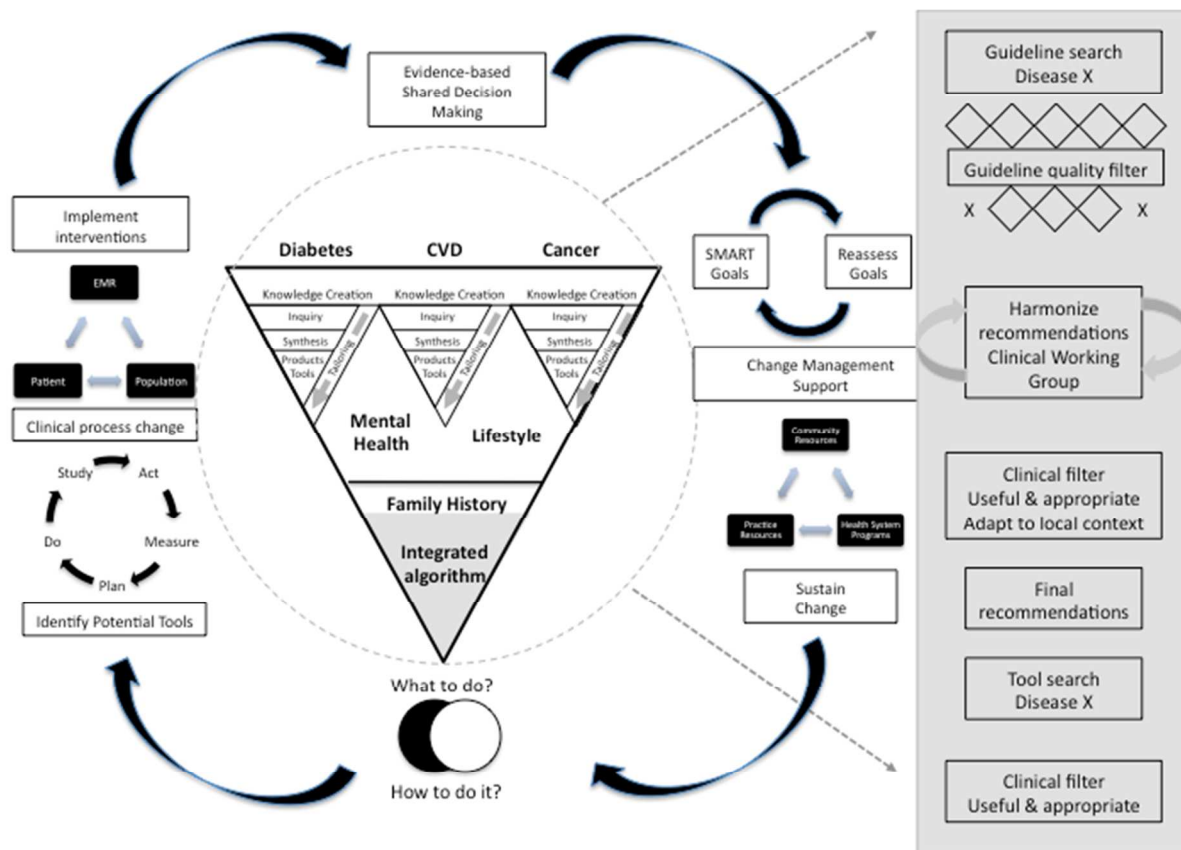

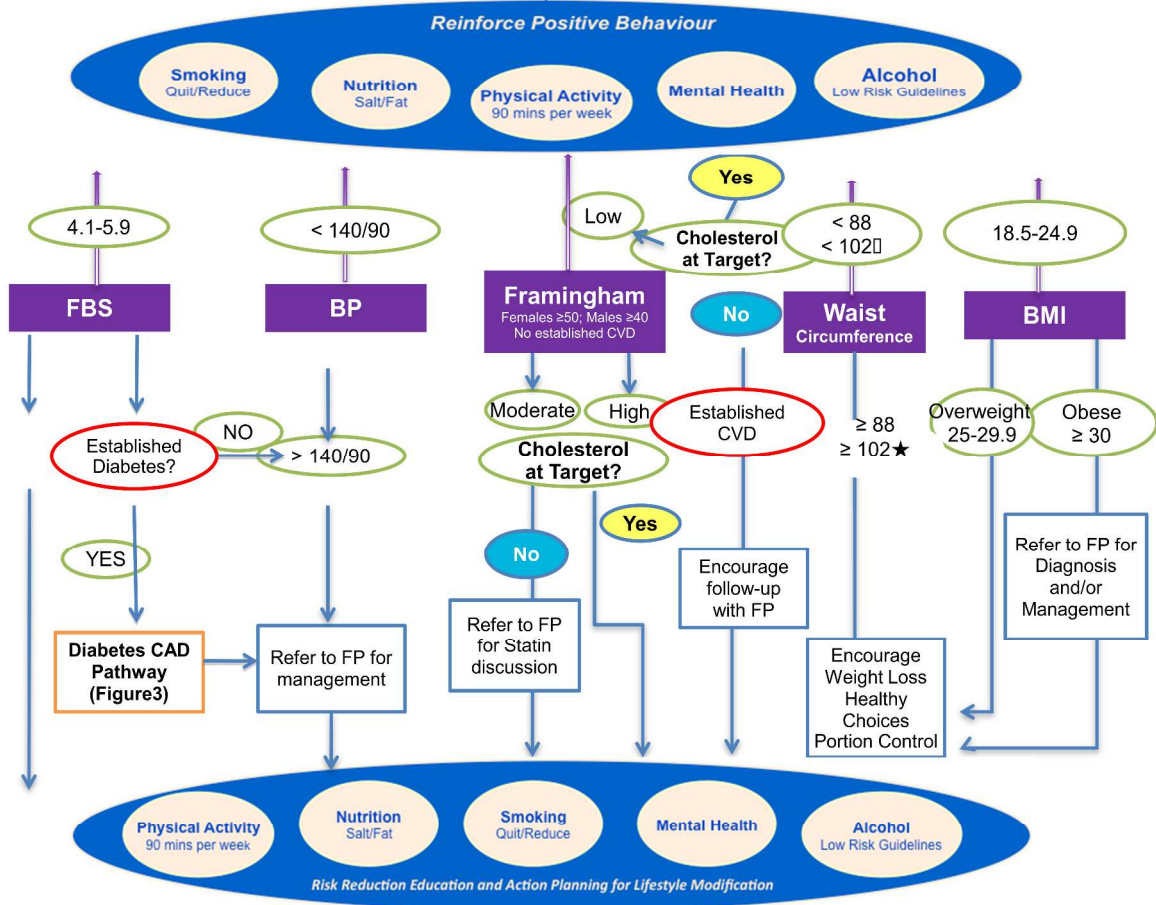

**Figure 2: The BETTER Map for primary prevention and screening for type 2 diabetes and coronary artery disease summarizes all of the relevant recommendations from the CPGs. Starting at the rectangular boxes in the middle of the diagram, each parameter is evaluated for the patient. If the patient is on target, follow the arrows up and reinforce positive lifestyle behavior. If the patient is not on target, follow the arrow down, consider appropriate interventions, and intervene on lifestyle behaviors. The risk calculator is used for shared-decision making to illustrate the impact of behaviors like smoking on cardiovascular health.**

1  
2  
3  
4  
5  
6  
7  
8  
9  
10  
11  
12  
13  
14  
15  
16  
17  
18  
19  
20  
21  
22  
23  
24  
25  
26  
27  
28  
29  
30  
31  
32  
33  
34  
35  
36  
37  
38  
39  
40  
41  
42  
43  
44  
45  
46  
47  
48  
49  
50  
51  
52  
53  
54  
55  
56  
57  
58  
59  
60

**Figure 3: The BETTER Map for primary prevention and screening for coronary artery disease in patients with pre-existing type 2 diabetes. This map summarizes the recommendations of the CPGs.**

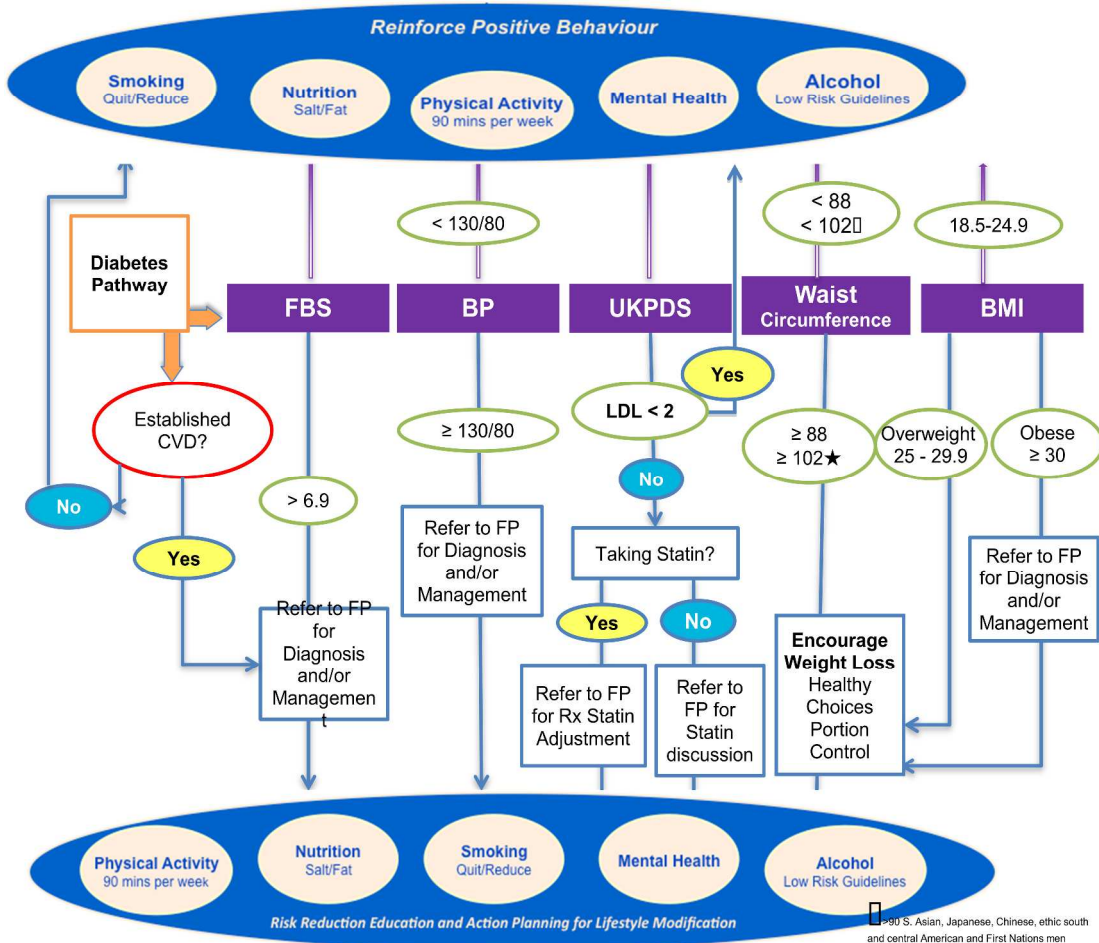

**Figure 4: The BETTER Map for primary prevention and screening for common cancers in primary care. This algorithm incorporates tools, which take family history into account to assess where routine population screening measures should be modified for higher risk patients. It incorporates some regional differences in screening protocols between jurisdictions, all of which were deemed reasonable by the CWG.**

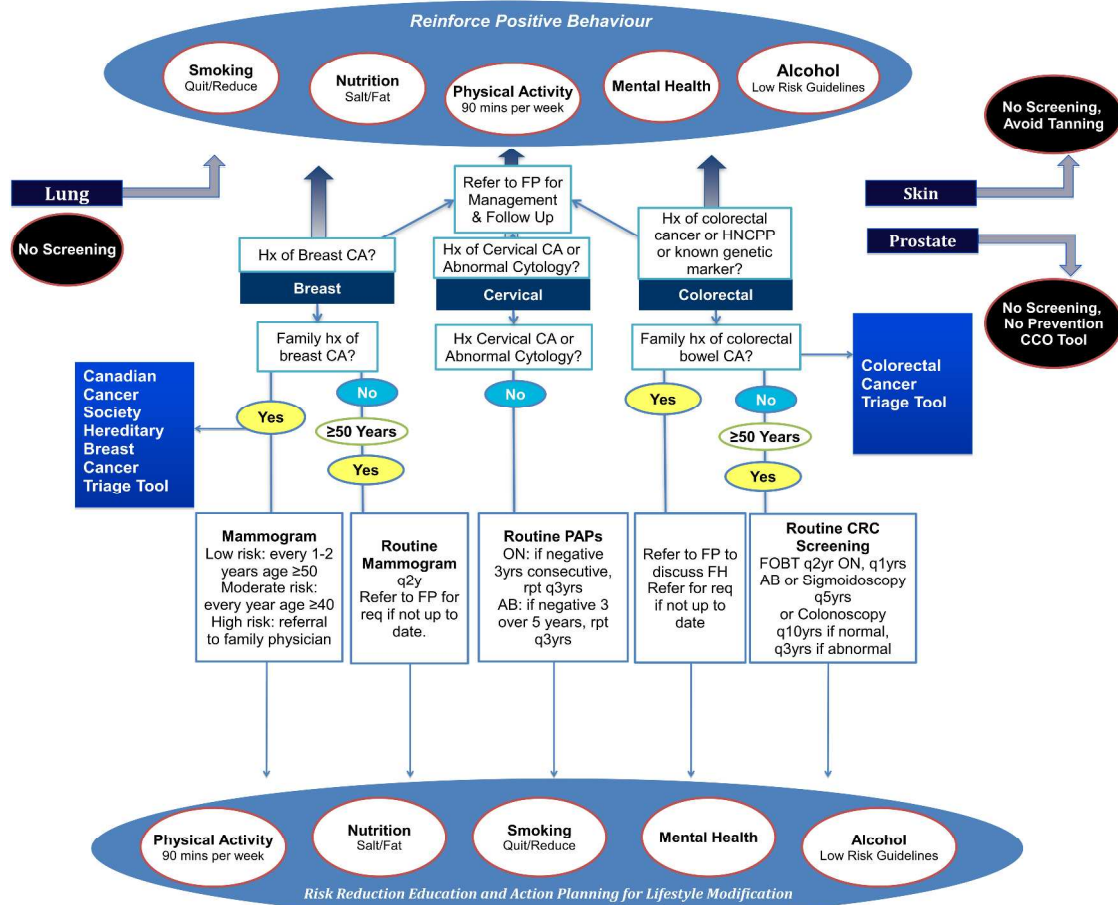

**Table 1: Four Step Search Process for High-Quality Clinical Practice Guidelines**

**1) Guideline Repositories:**

- CMA InfoBase – Clinical Practice Guidelines: <http://mdm.ca/cpgsnew/cpgs/index.asp>
- National Guideline Clearinghouse: <http://www.guidelines.gov>

**2) Renowned Developers:**

- National Institute for Clinical Excellence: <http://www.nice.org.uk/>
- New Zealand Guidelines Group: <http://www.nzgg.org.nz>
- Scottish Intercollegiate Guidelines Network: <http://www.sign.ac.uk/guidelines/index.html>
- University of Michigan: <http://cme.med.umich.edu/iCME/default.asp>
- US Preventative Services Task Force: <http://www.ahrq.gov/clinic/prevnew.htm>

**3) Websites of National and International Specialty Societies** (e.g. – for diabetes: the Canadian Diabetes Association, American Diabetes Association, etc.)

**4) General Internet Search:**

Google: [Topic] AND [Guideline(s)]. First 3 pages of results examined

**For the mental health CDPS uptake literature review**

- Medline and PsychINFO search using relevant mental health, primary care, and prevention MeSH search terms yielded 239 abstracts. A clinical filter was applied, with a clinician reviewing these abstracts and identifying 17 articles of interest. These articles were then reviewed by three other investigators for relevance; debate was resolved with consensus. Of these, three were considered of sufficient quality and applicability for subsequent review with the larger CWG of investigators for consideration of clinical applicability and acceptance in primary care.

**Table 2: Search Process for High-Quality Clinical Tools****1) Criteria for Consideration:**

- Published in English
- Address screening and primary prevention of topic area recommendations

**2) Search Strategy:****• Public Health Agency of Canada's Canadian Best Practices Portal****• Agency for Healthcare Research and Quality (AHRQ)**

- Preventive, Chronic and Primary Care

**• Internet search using Google:**

- [Topic] AND [Tools] AND [Prevention/Screening] AND [Canada] AND [Patients] AND [Providers]
- [Country] AND [Topic]. First 3 pages of results examined

**• Websites of national and provincial specialty societies****3) Criteria for inclusion:**

- Screening and Prevention tools
- More weight given to the most up to date tools, and those from Canadian and American organizations

**4) Extracting tools into table:**

- Includes name, description of tool, focus, source and organization
- Reviewer Instructions (type/usefulness and quality/applicability)
- CWG overall review for inclusion in tool kit

1  
2  
3  
4  
5  
6  
7  
8  
9  
10  
11  
12  
13  
14  
15  
16  
17  
18  
19  
20  
21  
22  
23  
24  
25  
26  
27  
28  
29  
30  
31  
32  
33  
34  
35  
36  
37  
38  
39  
40  
41  
42  
43  
44  
45  
46  
47  
48  
49

**Table 3: Appraising and Cataloguing High Quality Tools for Guideline Recommendation and Implementation**

**1) Extraction of Tools:**

- Unique name, description of tool, focus, source, organization

**2) Review Process:**

- Two independent reviewers, process for resolving differences
- Clear process for criteria to evaluate tools:
  - Type of tool/ Clinical usefulness
  - Quality of the tool/ Applicability
  - Validation of the tool in multiple settings

**3) Placing tools into tables:**

- Includes name, description of tool, focus, source and organization
- Reviewer of Instructions (type/usefulness and quality/applicability)
- CWG overall review for inclusion in the tool kit

Example: Figure 5.

**4) Need a method to index, search and retrieve tools in the literature:**

- Dedicated repositories exist, but they are not well indexed and the tools are not pre-appraised

1  
2  
3  
4  
5  
6  
7  
8  
9  
10  
11  
12  
13  
14  
15  
16  
17  
18  
19  
20  
21  
22  
23  
24  
25  
26  
27  
28  
29  
30  
31  
32  
33  
34  
35  
36  
37  
38  
39  
40  
41  
42  
43  
44  
45  
46  
47  
48  
49  
50  
51  
52  
53  
54  
55  
56  
57  
58  
59  
60

Confidential



**Table 4: Example of Harmonizing Guideline Recommendations by the CWG: Decisions Regarding Timing and Methods of Diabetes Screening in BETTER**

Every source guideline had its own taxonomy for strength of evidence of the guideline recommendations. The CWG process aimed to establish an actionable goal consistent with the combination of the different guideline recommendations.

| Guideline Recommendation | Verbatim Guidelines/<br>Varied Taxonomy for Strength of Recommendation from Different Developers                                                                                                                                                                                                                                                                                                                                                                                                                                                                                                                                                                                                                                                                                                                                                                                                                                                       | References | CWG Discussion                                                                                        |
|--------------------------|--------------------------------------------------------------------------------------------------------------------------------------------------------------------------------------------------------------------------------------------------------------------------------------------------------------------------------------------------------------------------------------------------------------------------------------------------------------------------------------------------------------------------------------------------------------------------------------------------------------------------------------------------------------------------------------------------------------------------------------------------------------------------------------------------------------------------------------------------------------------------------------------------------------------------------------------------------|------------|-------------------------------------------------------------------------------------------------------|
| I                        | All individuals should be evaluated annually for type 2 diabetes risk on the basis of demographic and clinical criteria <b>[Grade D, Consensus]</b> .                                                                                                                                                                                                                                                                                                                                                                                                                                                                                                                                                                                                                                                                                                                                                                                                  | 24         | Non-specific recommendation, captured better in II                                                    |
| II                       | Screening for diabetes using an FPG should be performed every 3 years in individuals $\geq 40$ years of age <b>[Grade D, Consensus]</b> . More frequent and/or earlier testing with either an FPG or a 2hPG in a 75-g OGTT should be considered in people with additional risk factors for diabetes <b>[Grade D, Consensus]</b> . These risk factors include:<br>First-degree relative with type 2 diabetes for members of a high-risk population (e.g. people of Aboriginal, Hispanic, Asian, South Asian or African descent)<br>* • History of IGT or IFG<br>* • Presence of complications associated with diabetes<br>* • Vascular disease (coronary, cerebrovascular or peripheral)<br>• History of gestational diabetes mellitus<br>* • History of delivery of a macrosomic infant<br>• Hypertension<br>* • Dyslipidemia<br>• Overweight<br>• Abdominal obesity<br>* • Polycystic ovary syndrome<br>* • Acanthosis nigricans<br>* • Schizophrenia | 24         | <b>Chosen recommendation by CWG</b><br><b>Those with * could feasibly be included in the project.</b> |
| III                      | Testing to detect pre-diabetes and type 2 diabetes in asymptomatic people should be considered in adults of any age who are overweight or obese                                                                                                                                                                                                                                                                                                                                                                                                                                                                                                                                                                                                                                                                                                                                                                                                        | 25         | Content included in II                                                                                |

|     |                                                                                                                                                                                                                                             |    |                                                                                          |
|-----|---------------------------------------------------------------------------------------------------------------------------------------------------------------------------------------------------------------------------------------------|----|------------------------------------------------------------------------------------------|
|     | (BMI $\geq$ 25 kg/m <sup>2</sup> ) and who have one or more additional risk factors for diabetes. In those without these risk factors, testing should begin at 45 years of age. <b>(B)</b>                                                  |    |                                                                                          |
| IV  | If tests are normal, repeat testing should be conducted, at least, at 3-year intervals. <b>(E)</b>                                                                                                                                          | 25 | Content included in II                                                                   |
| V   | Monitoring for the development of diabetes in those with pre-diabetes should be performed every year. <b>(E)</b>                                                                                                                            | 25 | <b>Chosen recommendation by CWG</b>                                                      |
| VI  | The USPSTF recommends screening for type 2 diabetes in asymptomatic adults with sustained blood pressure (either treated or untreated) greater than 135/80 mm Hg. <b>Grade: B Recommendation.</b>                                           | 26 | Content included in II                                                                   |
| VII | The USPSTF concludes that the current evidence is insufficient to assess the balance of benefits and harms of screening for type 2 diabetes in asymptomatic adults with blood pressure of 135/80 mm Hg or lower. <b>Grade: I Statement.</b> | 26 | Rejected in favor of II. The decisions to screen are not based on high quality evidence. |

## Appendix A: High Quality Clinical Practice Guidelines (CPGs) Identified by Topic

### Diabetes

- Canadian Diabetes Association Clinical Practice Guidelines Expert Committee. (2008, September). Canadian Diabetes Association 2008 clinical practice guidelines for the prevention and management of diabetes in Canada. Canadian Journal of Diabetes, 32(Supp1), S1-S201. Available from: [www.diabetes.ca/for-professionals/resources/2008-cpg/](http://www.diabetes.ca/for-professionals/resources/2008-cpg/)
- American Diabetes Association. (2010). American Diabetes Association clinical practice recommendations 2009. Diabetes Care 32(Supp 1), S1-S96. Available from: [http://care.diabetesjournals.org/content/33/Supplement\\_1](http://care.diabetesjournals.org/content/33/Supplement_1)
- U.S. Preventive Services Task Force. (2008, June). Screening for type 2 diabetes mellitus in adults. Agency for Healthcare Research and Quality. Available from: <http://www.ahrq.gov/Clinic/uspstf08/type2/type2rs.htm>

### Cardiovascular

- Scottish Intercollegiate Guidelines Network (SIGN). (2007). Risk estimation and the prevention of cardiovascular disease: A national clinical guideline. Available from: <http://www.sign.ac.uk/guidelines/fulltext/97/index.html>
- Canadian Cardiovascular Society (CCS). (2009). 2009 Canadian Cardiovascular Society/Canadian guidelines for the diagnosis and treatment of dyslipidemia and prevention of cardiovascular disease in the adult: 2009 recommendations. Canadian Journal of Cardiology, 25(10), 567-579. Available from: [http://www.ccs.ca/download/consensus\\_conference/consensus\\_conference\\_archives/2009\\_Dyslipidemia-Guidelines.pdf](http://www.ccs.ca/download/consensus_conference/consensus_conference_archives/2009_Dyslipidemia-Guidelines.pdf)

### Cancer - Breast, Colorectal, Cervical, Skin, and Lung

- U.S. Preventive Services Task Force. (2009, November 17). Screening for Breast Cancer: U.S. Preventive Services Task Force Recommendation Statement. Annals of Internal Medicine 151(10), 716-726. Available from: <http://www.annals.org/content/151/10/716.full>
- Agency for Healthcare Research and Quality (AHRQ). (2009). The guide to clinical preventive services 2009: Recommendations of the United States Preventive Services Task Force. Available from: <http://www.ahrq.gov/clinic/pocketgd09/pocketgd09.pdf>
- Institute for Clinical Systems Improvement (ICSI). (2009, October). Health care guideline: Preventive services for adults. Available from: [http://www.icsi.org/preventive\\_services\\_for\\_adults/preventive\\_services\\_for\\_adults\\_4.html](http://www.icsi.org/preventive_services_for_adults/preventive_services_for_adults_4.html)
- New Zealand Guidelines Group. (2009). Suspected cancer in primary care: Guidelines for investigation, referral and reducing ethnic disparities. Available from: [http://www.nzgg.org.nz/guidelines/0158/suspected\\_cancer\\_guideline\\_web.pdf](http://www.nzgg.org.nz/guidelines/0158/suspected_cancer_guideline_web.pdf)
- McLachlin, C.M., Mai, V., Murphy, J., Fung Kee Fung, M., Chambers, A. and members of the Cervical Screening Guidelines Development Committee of the Ontario Cervical Screening Program and the Gynecology Cancer Disease

Site Group of Cancer Care Ontario. (2005, May 20). Cervical screening: Practice guidelines report. Program in Evidence-Based Care, A Cancer Care Ontario Program. Available from:

[http://www.cancercare.on.ca/pdf/pebc\\_cervical\\_screen\\_s.pdf](http://www.cancercare.on.ca/pdf/pebc_cervical_screen_s.pdf)

- U.S. Preventive Services Task Force. (2008, November 4). Screening for Colorectal Cancer: U.S. Preventive Services Task Force recommendation statement. *Annals of Internal Medicine* 149(9) 627-663. Available from: <http://www.annals.org/content/149/9/627.full>
- American College of Chest Physicians. (2007). Diagnosis and management of lung cancer: ACCP guidelines, 2nd ed. Available from: [http://chestjournal.chestpubs.org/content/132/3\\_suppl](http://chestjournal.chestpubs.org/content/132/3_suppl)
- U.S. Preventive Services Task Force. (2009, February 3) Screening for skin cancer: U.S. Preventive Services Task Force recommendation statement. *Annals of Internal Medicine* 150(3), 188-193. Available from: <http://www.annals.org/content/150/3/188.full.pdf+html>
- New Zealand Guidelines Group. (2008). Clinical practice guidelines in Australia and New Zealand for the management of melanoma. Available from: [http://www.nzgg.org.nz/guidelines/0141/Melanoma\\_Full\\_GL.pdf](http://www.nzgg.org.nz/guidelines/0141/Melanoma_Full_GL.pdf)

### Lifestyle

- Agency for Healthcare Research and Quality (AHRQ). (2009). The guide to clinical preventive services 2009: Recommendations of the United States Preventive Services Task Force. Available from: <http://www.ahrq.gov/clinic/pocketgd09/pocketgd09.pdf>

Guidelines selected for Cancer, Cardiovascular Disease, and Diabetes with recommendations on lifestyle:

- Canadian Diabetes Association Clinical Practice Guidelines Expert Committee. (2008, September). Canadian Diabetes Association 2008 clinical practice guidelines for the prevention and management of diabetes in Canada. *Canadian Journal of Diabetes*, 32(Supp1), S1-S201. Available from: [www.diabetes.ca/for-professionals/resources/2008-cpg/](http://www.diabetes.ca/for-professionals/resources/2008-cpg/)
- American Diabetes Association. (2010). American Diabetes Association clinical practice recommendations 2010. *Diabetes Care* 33(Supp 1), S1-S98. Available from: [http://care.diabetesjournals.org/content/33/Supplement\\_1](http://care.diabetesjournals.org/content/33/Supplement_1)
- U.S. Preventive Services Task Force. (2008, June). Screening for type 2 diabetes mellitus in adults. Agency for Healthcare Research and Quality. Available from: <http://www.ahrq.gov/Clinic/uspstf08/type2/type2rs.htm>
- Scottish Intercollegiate Guidelines Network (SIGN). (2007). Risk estimation and the prevention of cardiovascular disease: A national clinical guideline. Available from: <http://www.sign.ac.uk/guidelines/fulltext/97/index.html>

### Family History

Guidelines selected for Cancer, Cardiovascular Disease, Diabetes and Lifestyle with recommendations on family history:

- Institute for Clinical Systems Improvement (ICSI). (2009, October). Health care guideline: Preventive services for adults. Available from: [http://www.icsi.org/preventive\\_services\\_for\\_adults/preventive\\_services\\_for\\_adults\\_4.html](http://www.icsi.org/preventive_services_for_adults/preventive_services_for_adults_4.html)

- Agency for Healthcare Research and Quality (AHRQ). (2009). The guide to clinical preventive services 2009: Recommendations of the United States Preventive Services Task Force. Available from: <http://www.ahrq.gov/clinic/pocketgd09/pocketgd09.pdf>
- New Zealand Guidelines Group. (2008). Clinical practice guidelines in Australia and New Zealand for the management of melanoma. Available from: [http://www.nzgg.org.nz/guidelines/0141/Melanoma\\_Full\\_GL.pdf](http://www.nzgg.org.nz/guidelines/0141/Melanoma_Full_GL.pdf)
- Scottish Intercollegiate Guidelines Network (SIGN). (2007). Risk estimation and the prevention of cardiovascular disease: A national clinical guideline. Available from: <http://www.sign.ac.uk/guidelines/fulltext/97/index.html>

#### Selected Systematic Reviews on Family History:

- Wilson BJ, Qureshi N, Santaguida P, Little J, Carroll JC, Allanson J, Raina P. (2009). Systematic review: Family history in risk assessment for common diseases. *Ann Int Med*;151:878-885. Available from: <http://www.annals.org/content/early/2009/11/02/0003-4819-151-12-200912150-00177.full>
- Agency for Healthcare Research and Quality (AHRQ) (2009). Family history and improving health. Evidence Report/Technology Assessment No 186. Available from: <http://www.ahrq.gov/downloads/pub/evidence/pdf/famhistory/famhimp.pdf>
- Plat AW, Kroon AA, Van Schayck CP, De Leeuw PW, Stoffers HE. (2009). Obtaining the family history for common, multifactorial diseases by family physicians. A descriptive systematic review. *European Journal of General Practice*;15:231-242.
- Agency for Healthcare Research and Quality (AHRQ) (2009). Clinical utility of cancer family history collection in primary care. Available from: <http://www.ahrq.gov/downloads/pub/evidence/pdf/famhistory/famhist2.pdf>

#### Mental Health

Guidelines selected for Cancer, Cardiovascular Disease, Diabetes and Lifestyle with recommendations related to mental health:

- American College of Chest Physicians. (2007). Diagnosis and management of lung cancer: ACCP guidelines, 2nd ed. Available from: [http://chestjournal.chestpubs.org/content/132/3\\_suppl](http://chestjournal.chestpubs.org/content/132/3_suppl)
- Scottish Intercollegiate Guidelines Network (SIGN). (2007). Risk estimation and the prevention of cardiovascular disease: A national clinical guideline. Available from: <http://www.sign.ac.uk/guidelines/fulltext/97/index.html>
- Canadian Diabetes Association Clinical Practice Guidelines Expert Committee. (2008, September). Canadian Diabetes Association 2008 clinical practice guidelines for the prevention and management of diabetes in Canada. *Canadian Journal of Diabetes*, 32(Supp1), S1-S201. Available from: [www.diabetes.ca/for-professionals/resources/2008-cpg/](http://www.diabetes.ca/for-professionals/resources/2008-cpg/)
- American Diabetes Association. (2010). American Diabetes Association clinical practice recommendations 2009. *Diabetes Care* 32(Supp 1), S1-S96. Available from: [http://care.diabetesjournals.org/content/33/Supplement\\_1](http://care.diabetesjournals.org/content/33/Supplement_1)

1  
2  
3  
4  
5  
6  
7  
8  
9  
10  
11  
12  
13  
14  
15  
16  
17  
18  
19  
20  
21  
22  
23  
24  
25  
26  
27  
28  
29  
30  
31  
32  
33  
34  
35  
36  
37  
38  
39  
40  
41  
42  
43  
44  
45  
46  
47  
48  
49  
50  
51  
52  
53  
54  
55  
56  
57  
58  
59  
60

Confidential
